# Supplementary material for: The Efficacy of Pyrotinib as a Third- or Higher-Line Treatment in HER2-Positive Metastatic Breast Cancer Patients Exposed to Lapatinib Compared to Lapatinib-Naive Patients: A Real-World Study
Source: PubMed Central journal article supplement (PMC8428978; doi:10.3389/fphar.2021.682568), 2021-08-26
Supplement: Image1.pdf [file Image1.pdf]

## Supplementary Material

### 1 Supplementary Figures

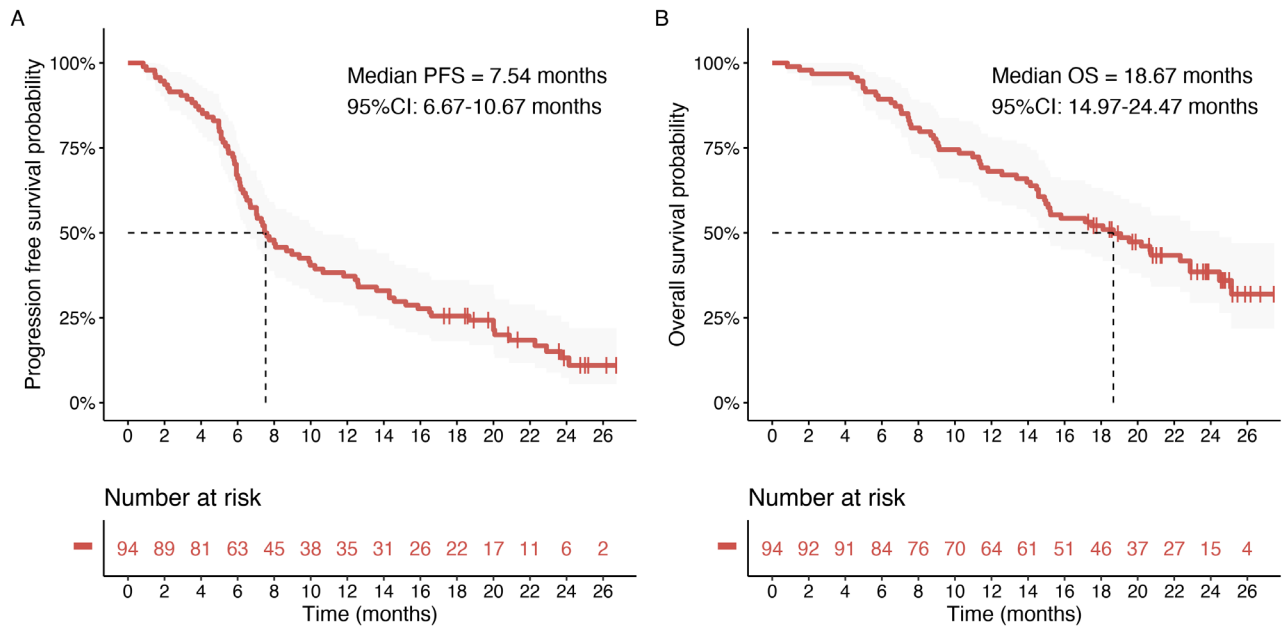

**Supplementary Figure 1.** Kaplan–Meier survival curves of PFS and OS for the entire cohort of patients with HER2-positive MBC (n = 94).
